# Supplementary material for: UniChip enables long-term recirculating unidirectional perfusion with gravity-driven flow for microphysiological systems
Source: Royal Society of Chemistry journal article supplement (doi:10.1039/c8lc00394g), 2018-01-01
Supplement: c8lc00394g1.pdf [file c8lc00394g1.pdf]

## Supplementary information

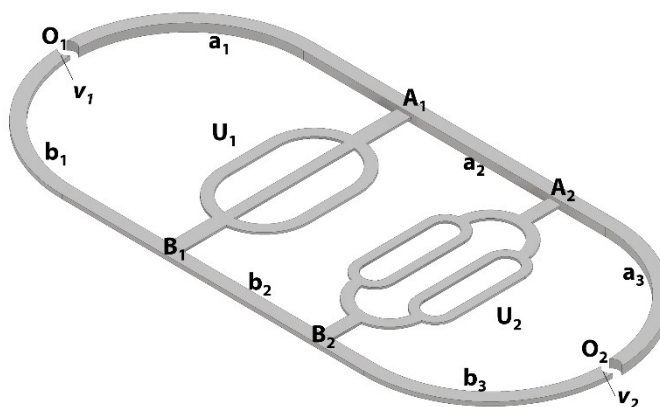

**Figure S1.** Fluid network of an example multi-channel, multi-unit UniChip. O<sub>1</sub> and O<sub>2</sub> are I/O ports; U<sub>1</sub> with 3 branches and U<sub>2</sub> with 4 branches are two unidirectional channel networks (UCNs); a<sub>1</sub>, a<sub>2</sub>, a<sub>3</sub>, b<sub>1</sub>, b<sub>2</sub>, and b<sub>3</sub> are supporting channels.  $R_x$  is the hydraulic resistance of

channel x.  $\frac{R_{a_1}}{R_{b_1}} = \frac{R_{a_2}}{R_{b_2}} = \frac{R_{a_3}}{R_{b_3}}$  (by designing channel a<sub>i</sub> and b<sub>i</sub> to have same length and width but different depth (i=1, 2, or 3)). v<sub>1</sub> and v<sub>2</sub> are one-way valves. v<sub>1</sub> only allows fluid in b<sub>1</sub> flows from B<sub>1</sub> to O<sub>1</sub>; v<sub>2</sub> only allows fluid in b<sub>3</sub> flows from B<sub>2</sub> to O<sub>2</sub>.

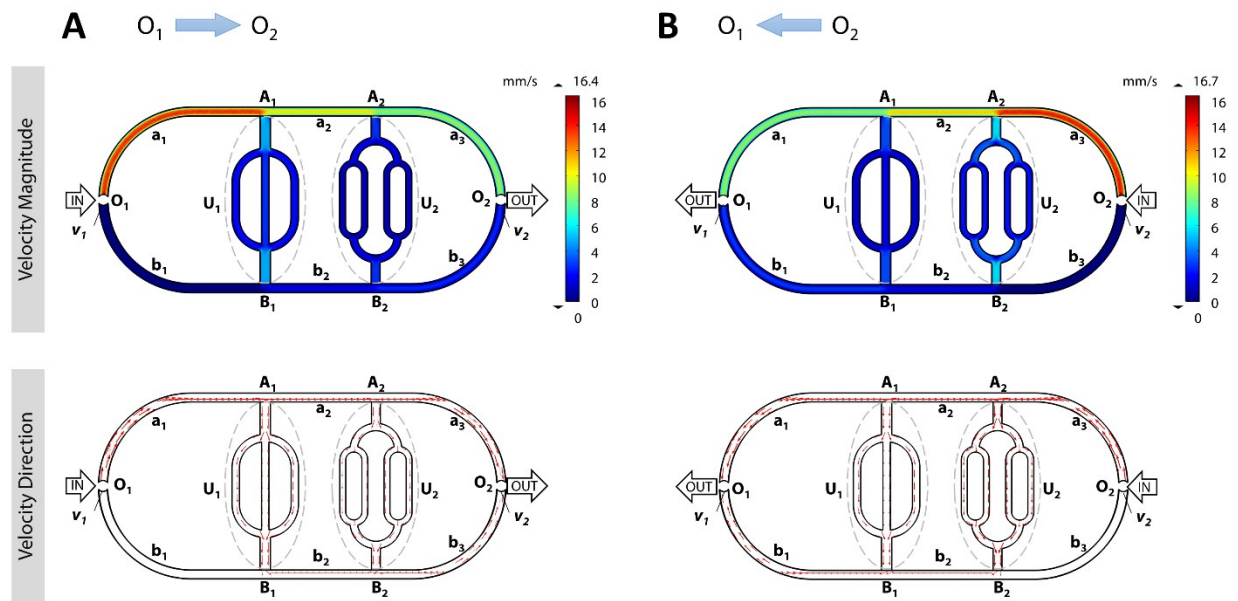

**Figure S2.** Simulated velocity field (magnitude and direction) of the example multi-channel, multi-unit UniChip (Figure 1) with reciprocating flow input: A)  $O_1 \rightarrow O_2$ ; pressure was set to 30 pa for  $O_1$  and 0 for  $O_2$  for simulation; B)  $O_2 \rightarrow O_1$ ; pressure was set to 30 pa for  $O_2$  and 0 for  $O_1$ ; In both cases, flow in  $U_1$  is from  $A_1$  to  $B_1$ , and flow in  $U_2$  is from  $A_2$  to  $B_2$  (arrows)

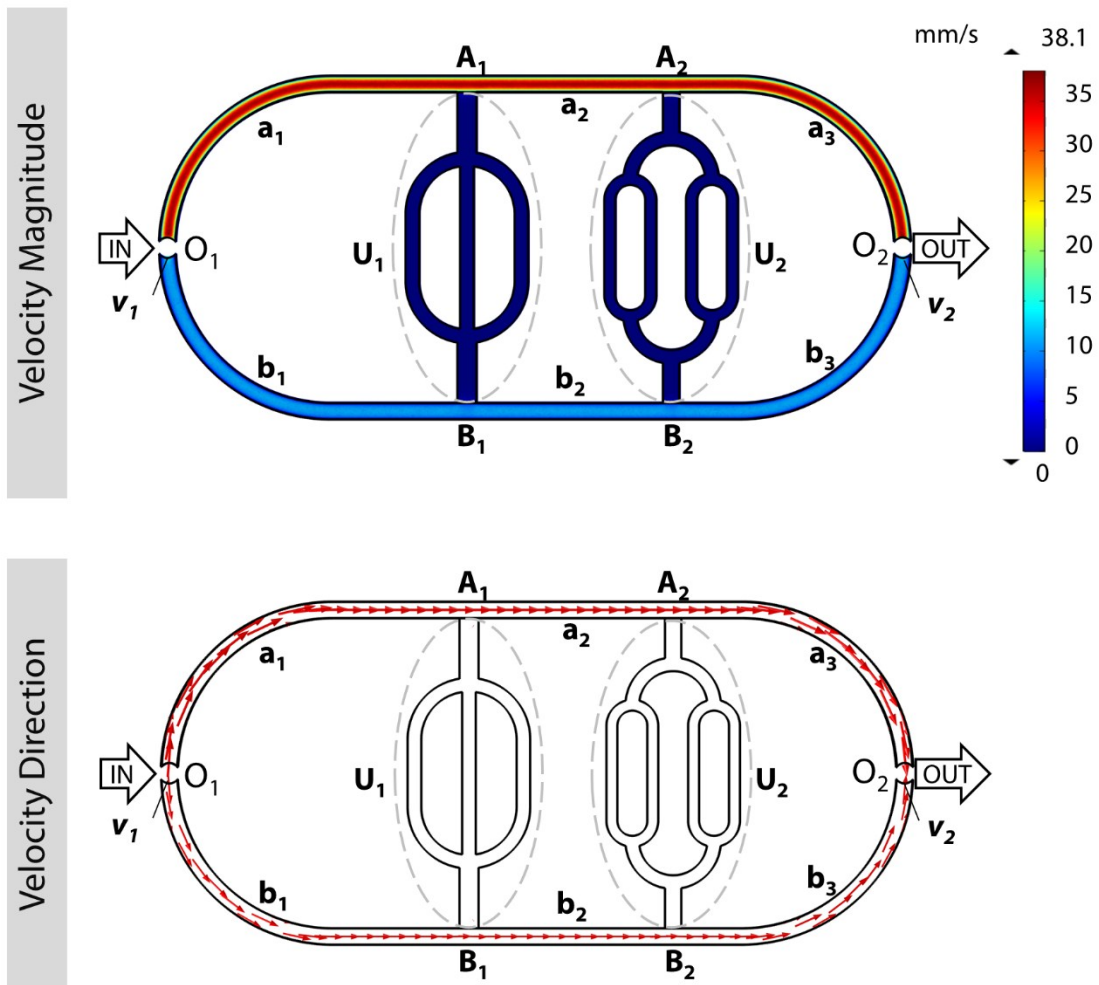

**Figure S3.** Operation of the backflow proof mechanism in the example multi-channel, multi-unit UniChip when valves fail to limit backflow. Simulated velocity field in the UniChip, when  $v_1$  completely fails to limit backflow (from  $O_1 \rightarrow B_1$  through  $b_1$ ). Fluid flows from  $O_1$  to  $O_1$  through  $a_1$ ,  $a_2$ , and  $a_3$ , or through  $b_1$ ,  $b_2$ , and  $b_3$ . Flows in  $U_1$  and  $U_2$  approach 0 without changing flow direction.
